# Supplementary material for: A curcumin-based AIEE-active fluorescent probe for Cu2+detection in aqueous solution
Source: Royal Society of Chemistry journal article supplement (doi:10.1039/d2ra02595g), 2022-01-01
Supplement: d2ra02595g1.pdf [file d2ra02595g1.pdf]

## Support Information

### A curcumin-based AIEE-active fluorescent probe for Cu<sup>2+</sup> detection in aqueous solution

Yang Lin,<sup>a</sup> Ao Yu,<sup>a</sup> Jinjing Wang,<sup>a</sup> Derui Kong,<sup>a</sup> Hongtao Liu,<sup>\*a</sup> Jianwei Li<sup>\*a</sup> and Chunman Jia<sup>\*a</sup>

<sup>a</sup> Hainan Provincial Key Lab of Fine Chem, School of Chemical Engineering and Technology,  
Hainan University, Haikou 570228, China.

#### CONTENTS

|                                                                |                    |
|----------------------------------------------------------------|--------------------|
| 1. NMR Spectra                                                 | Fig. S1-S10        |
| 2. HRMS Spectra                                                | Fig. S11-S16       |
| 3. Crystal photograph of <b>L1</b>                             | Fig. S17           |
| 4. X-ray crystallography Analysis                              | Table S1           |
| 5. Cu <sup>2+</sup> response of compound <b>L1</b>             | Fig. S18           |
| 6. Particle size of <b>L1</b>                                  | Fig. S19           |
| 7. Fluorescence lifetime                                       | Fig. S20           |
| 8. Effect of pH                                                | Fig. S21           |
| 9. Job's Plot                                                  | Fig. S22           |
| 10. Benesi-Hildebrand plot                                     | Fig. S23           |
| 11. Detection limit                                            | Fig. S24, Table S2 |
| 12. Fluorescence intensity of Cu <sup>2+</sup> indicator paper | Fig. S25           |

## 1. NMR Spectra

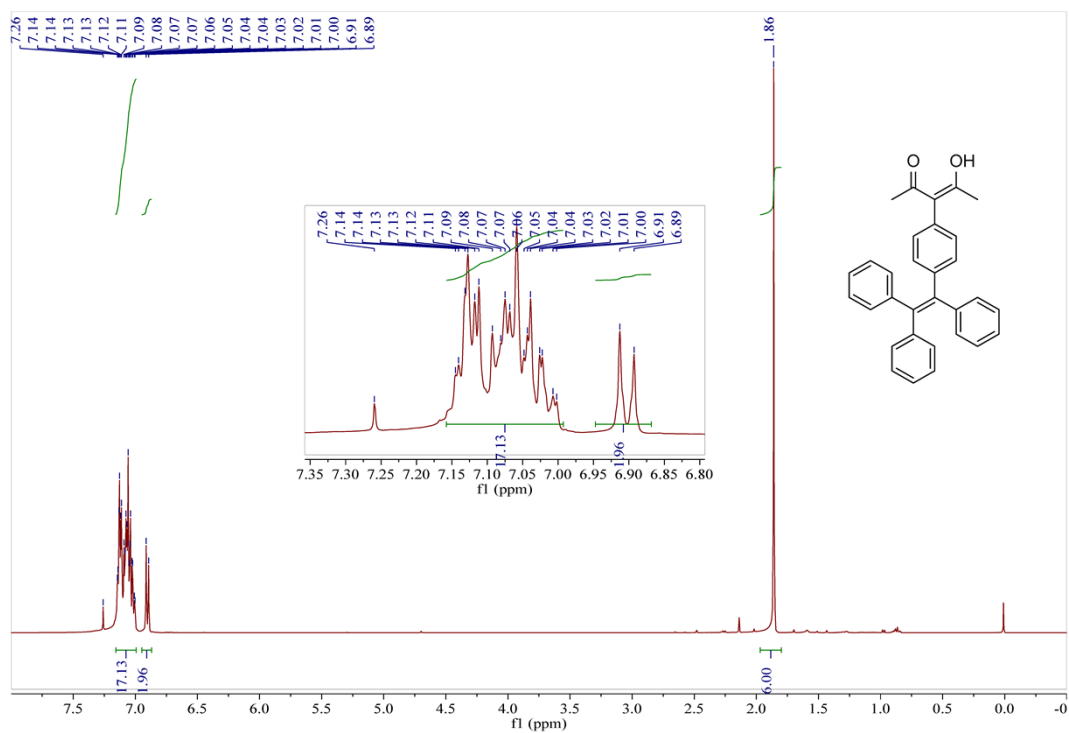

Fig. S1 <sup>1</sup>H NMR spectrum of compound 1 conducted in chloroform-*d*.

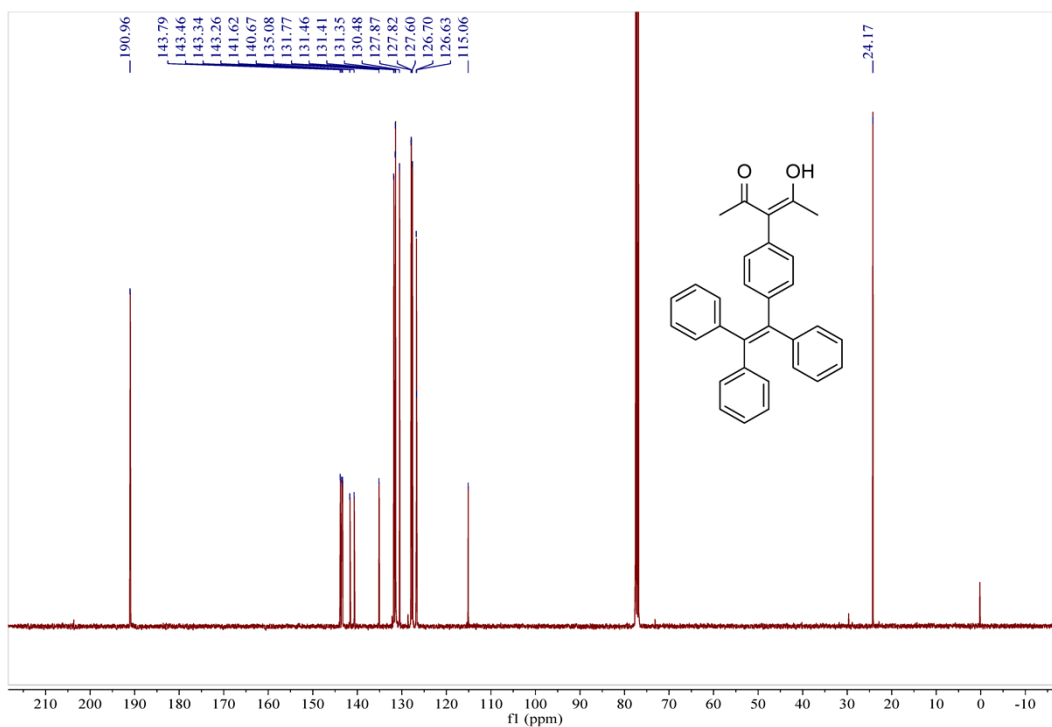

Fig. S2 <sup>13</sup>C NMR spectrum of compound 1 conducted in chloroform-*d*.

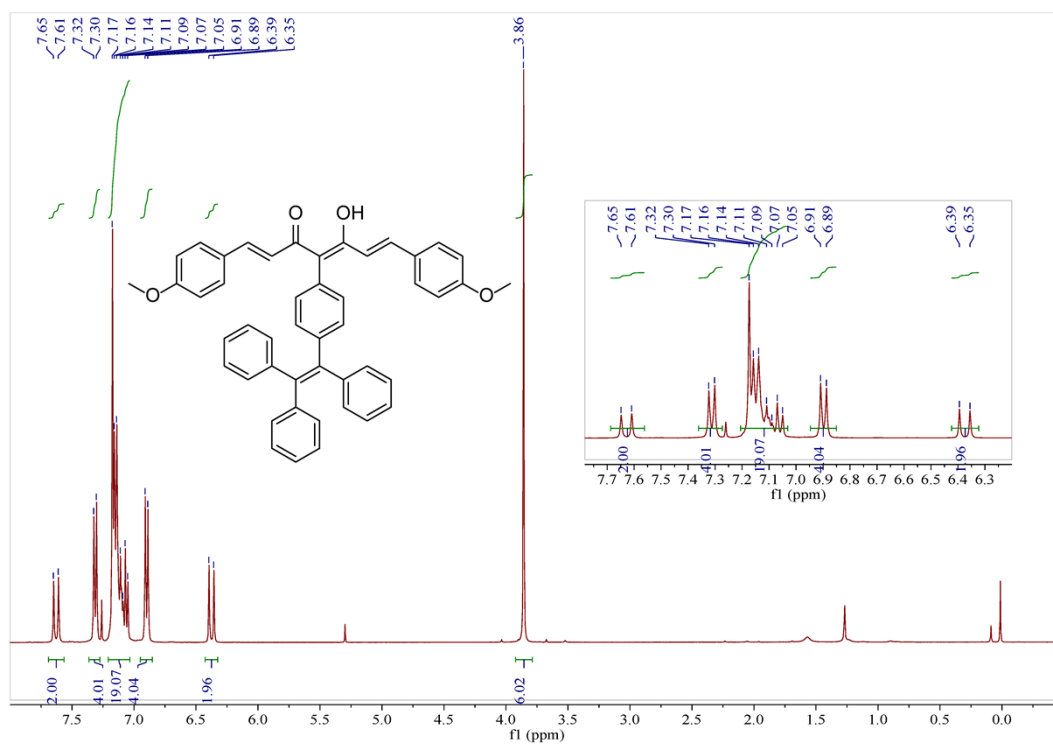

Fig. S3 <sup>1</sup>H NMR spectrum of compound L1 conducted in chloroform-*d*.

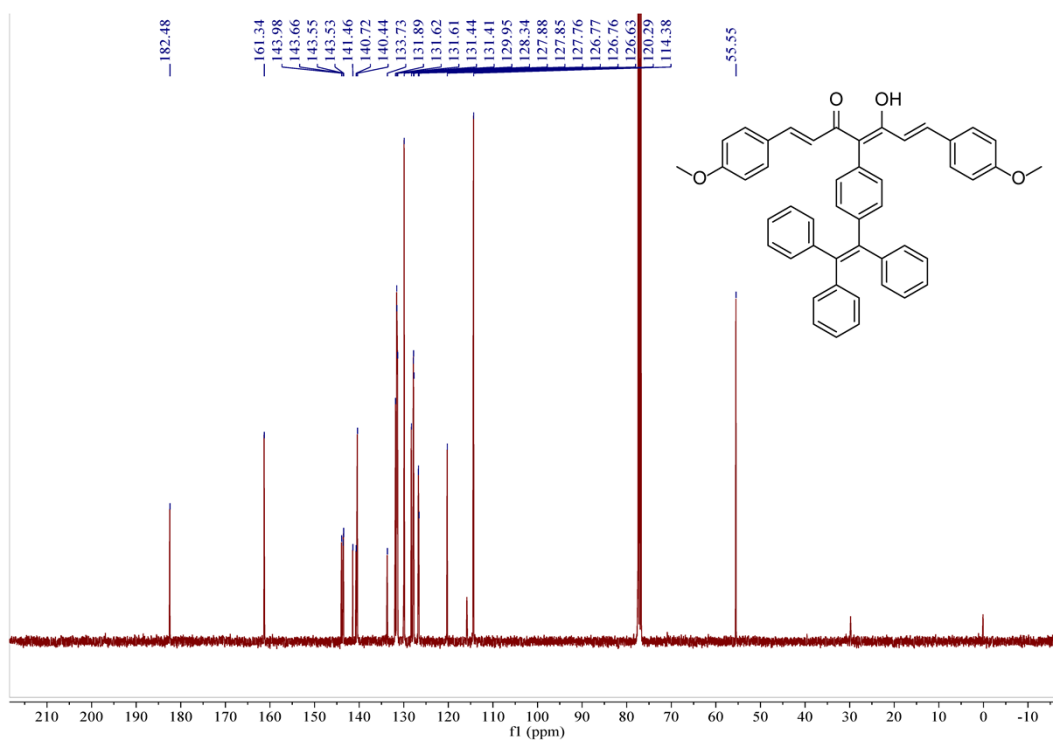

Fig. S4 <sup>13</sup>C NMR spectrum of compound L1 conducted in chloroform-*d*.

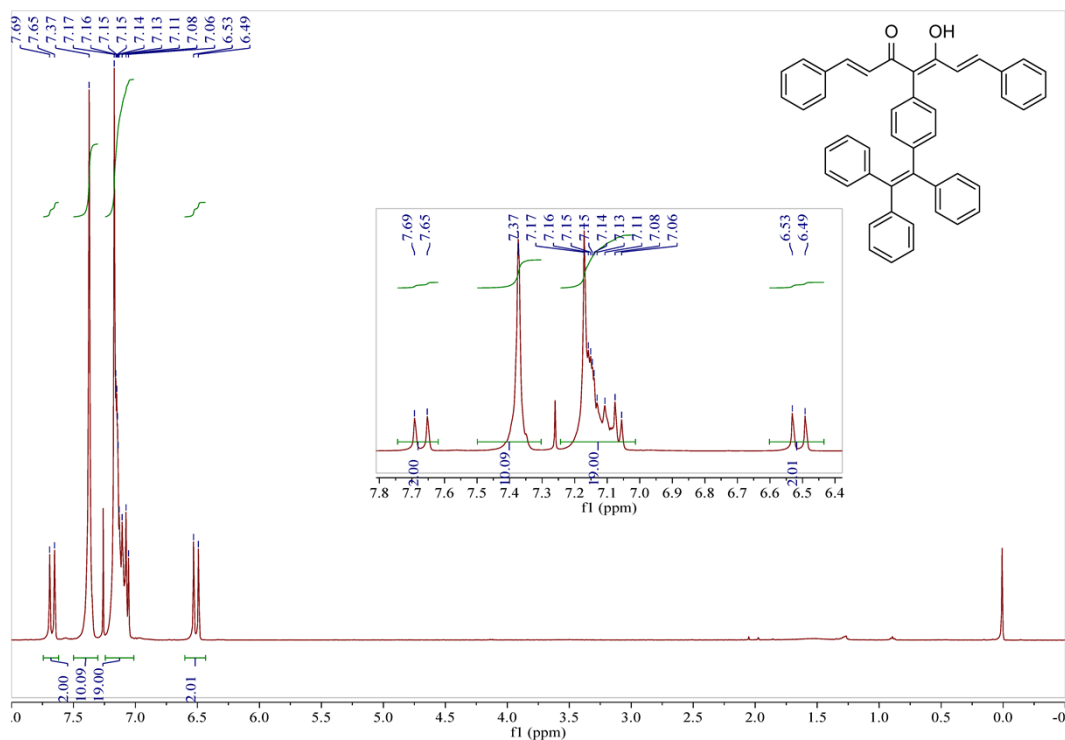

Fig. S5 <sup>1</sup>H NMR spectrum of compound L2 conducted in chloroform-*d*.

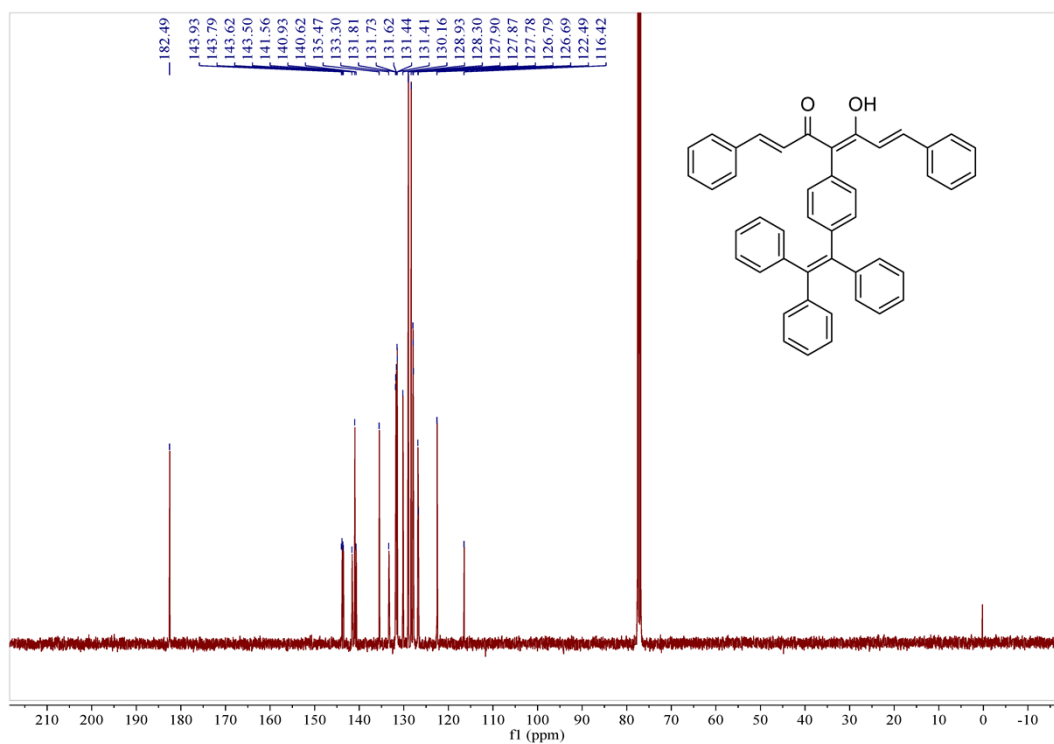

Fig. S6 <sup>13</sup>C NMR spectrum of compound L2 conducted in chloroform-*d*.

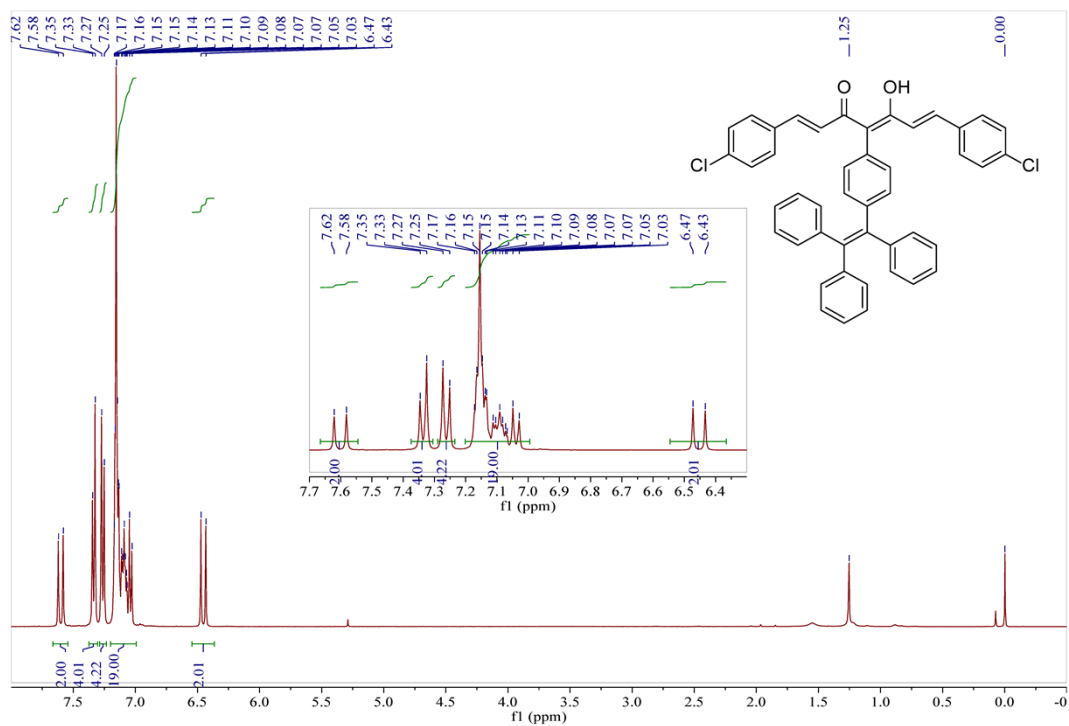

Fig. S7 <sup>1</sup>H NMR spectrum of compound L3 conducted in chloroform-*d*.

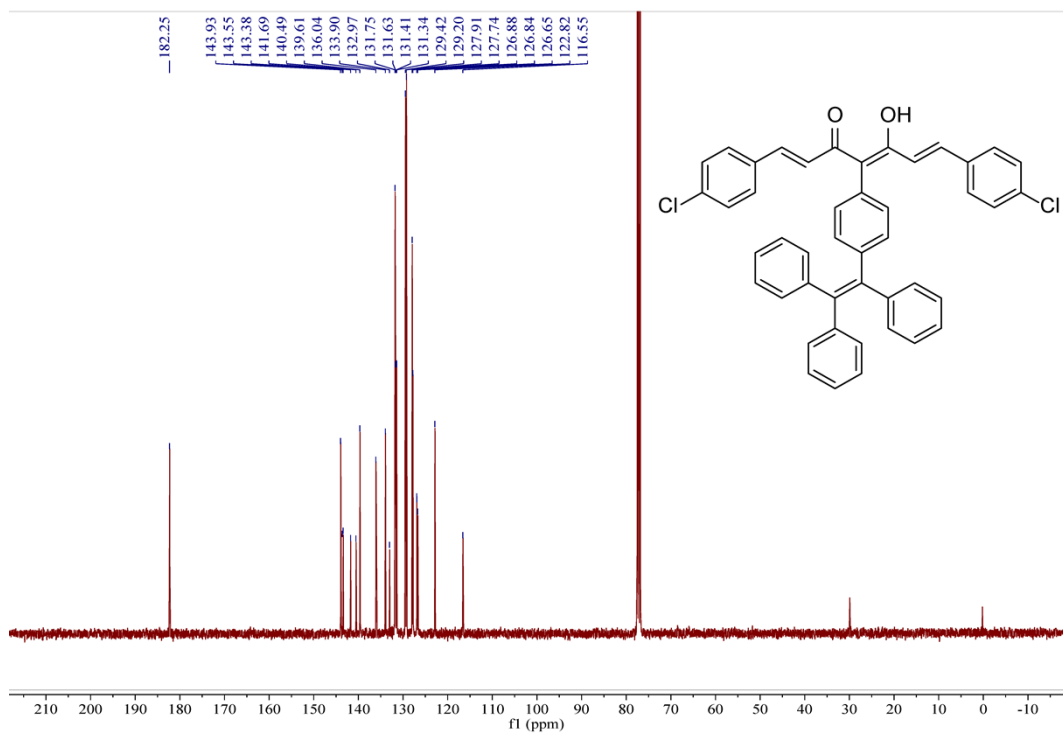

Fig. S8 <sup>13</sup>C NMR spectrum of compound L3 conducted in chloroform-*d*.

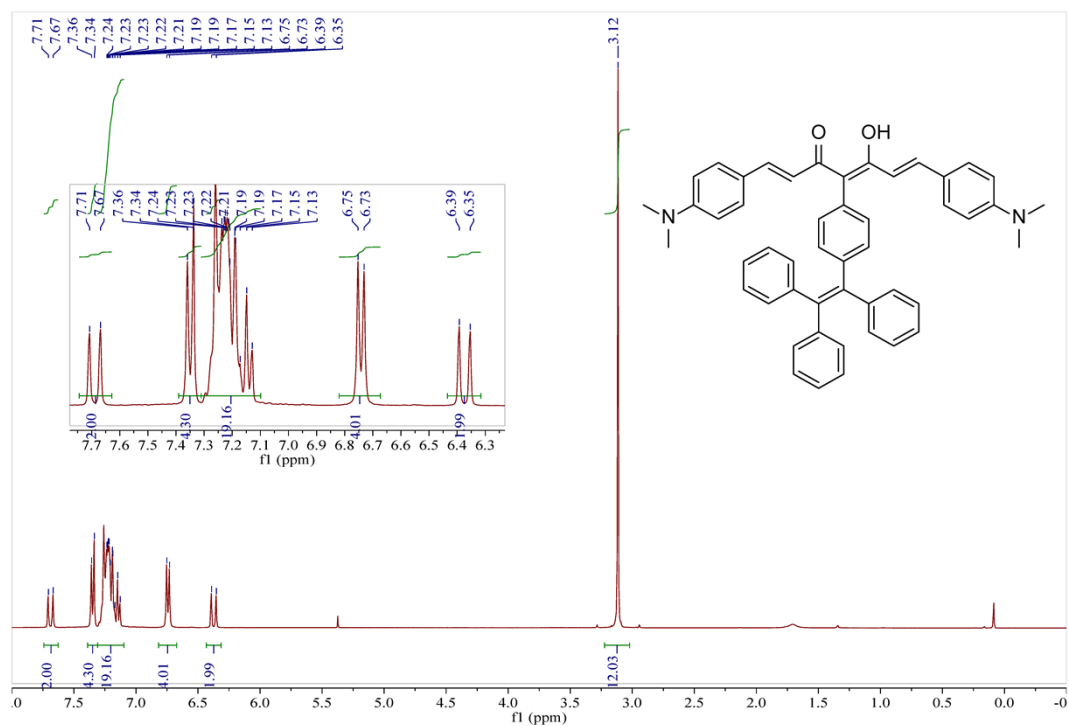

Fig. S9 <sup>1</sup>H NMR spectrum of compound L4 conducted in chloroform-*d*.

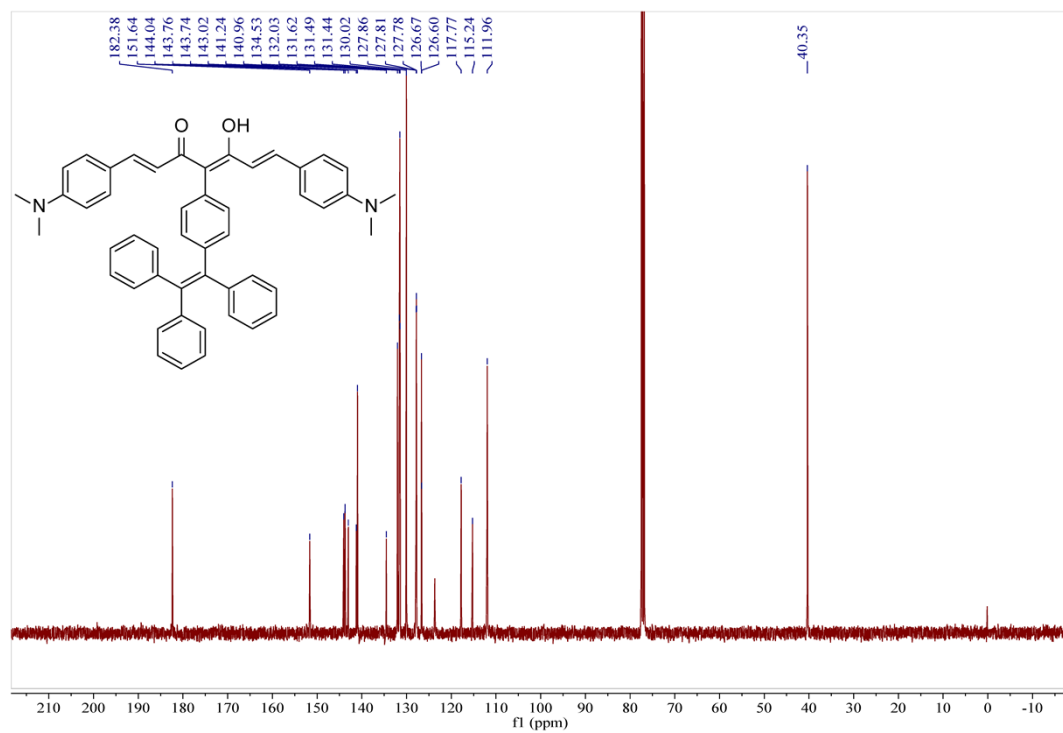

Fig. S10 <sup>13</sup>C NMR spectrum of compound L4 conducted in chloroform-*d*.

## 2. HRMS Spectra

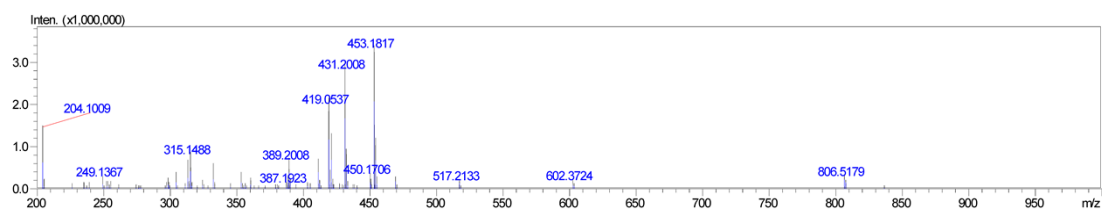

Fig. S11 HRMS spectrum of compound 1.

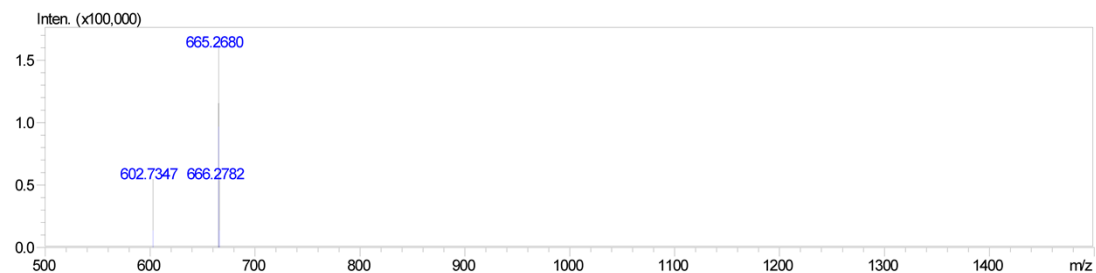

Fig. S12 HRMS spectrum of compound L1.

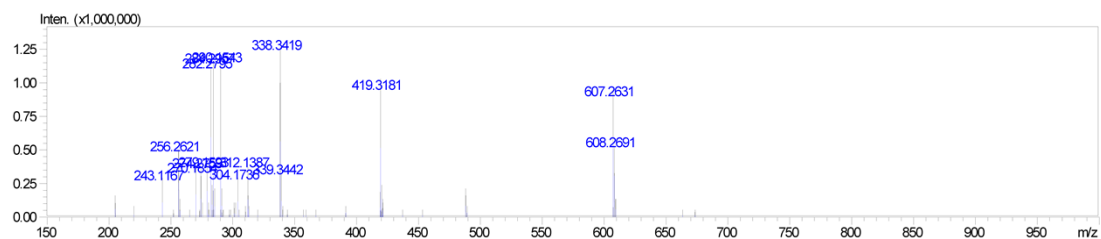

Fig. S13 HRMS spectrum of compound L2.

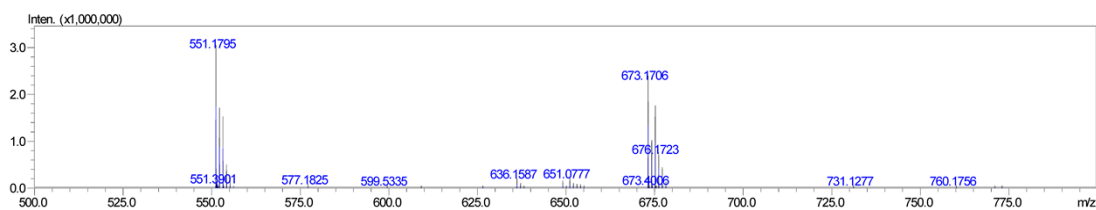

Fig. S14 HRMS spectrum of compound L3.

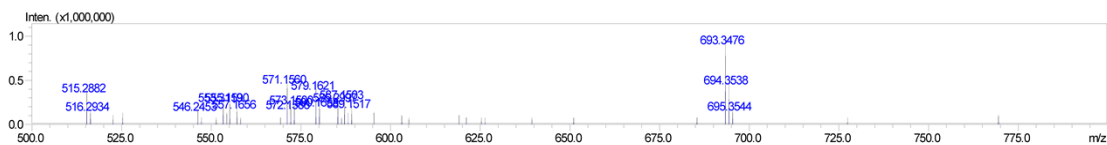

Fig. S15 HRMS spectrum of compound L4.

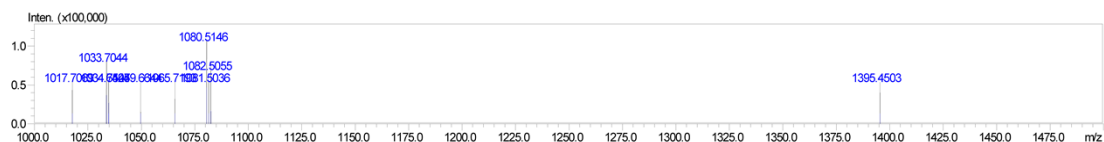

Fig. S16 HRMS spectrum of complex [2L1+Cu<sup>2+</sup>].

### 3. Crystal photo of L1

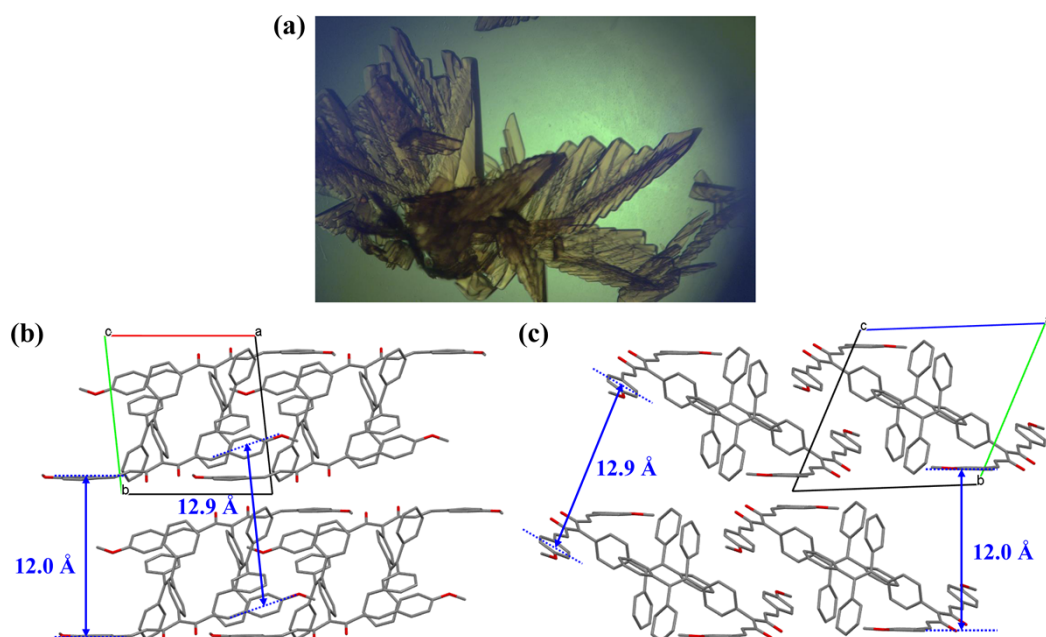

**Fig. S17** (a) Crystal photograph of **L1**; (b) and (c) Different views of the extended-crystal structure viewed from c-axis (the hydrogen atoms are hidden for clarity). The hydrogen atoms are marked in white, carbon atoms in gray, and oxygen atoms in red.

### 4. X-ray crystallography Analysis

**Table S1** Summary of crystal data of **L1**.

| Parameter                              | <b>L1</b>                                      |
|----------------------------------------|------------------------------------------------|
| Empirical formula                      | C <sub>47</sub> H <sub>38</sub> O <sub>4</sub> |
| Formula weight                         | 666.77                                         |
| Temperature/K                          | 150.0                                          |
| Crystal system                         | triclinic                                      |
| Space group                            | <i>P</i> -1                                    |
| <i>a</i> /Å                            | 11.3529 (9)                                    |
| <i>b</i> /Å                            | 13.0942 (11)                                   |
| <i>c</i> /Å                            | 13.9528 (12)                                   |
| $\alpha$ /°                            | 63.486 (5)                                     |
| $\beta$ /°                             | 77.327 (6)                                     |
| $\gamma$ /°                            | 78.923 (6)                                     |
| Volume/Å <sup>3</sup>                  | 1800.2 (3)                                     |
| <i>Z</i>                               | 2                                              |
| $\rho_{\text{calc}}$ /cm <sup>3</sup>  | 1.230                                          |
| $\mu$ /mm <sup>-1</sup>                | 0.607                                          |
| F(000)                                 | 704.0                                          |
| Crystal size/mm <sup>3</sup>           | 0.2 × 0.15 × 0.1                               |
| Radiation                              | CuK $\alpha$ ( $\lambda$ = 1.54178)            |
| 2 $\theta$ range for data collection/° | 7.164 to 144.646                               |



|                                                |                                                               |
|------------------------------------------------|---------------------------------------------------------------|
| Index ranges                                   | $-14 \leq h \leq 14, -16 \leq k \leq 16, -17 \leq l \leq 17$  |
| Reflections collected                          | 20467                                                         |
| Independent reflections                        | 7034 [ $R_{\text{int}} = 0.0365, R_{\text{sigma}} = 0.0456$ ] |
| Data/restraints/parameters                     | 7034/0/463                                                    |
| Goodness-of-fit on $F^2$                       | 1.094                                                         |
| Final R indexes [ $I \geq 2\sigma(I)$ ]        | $R_1 = 0.0770, wR_2 = 0.2143$                                 |
| Final R indexes [all data]                     | $R_1 = 0.0876, wR_2 = 0.2316$                                 |
| Largest diff. peak/hole / $e \text{ \AA}^{-3}$ | 0.40/-0.19                                                    |

### 5. $\text{Cu}^{2+}$ response of L1

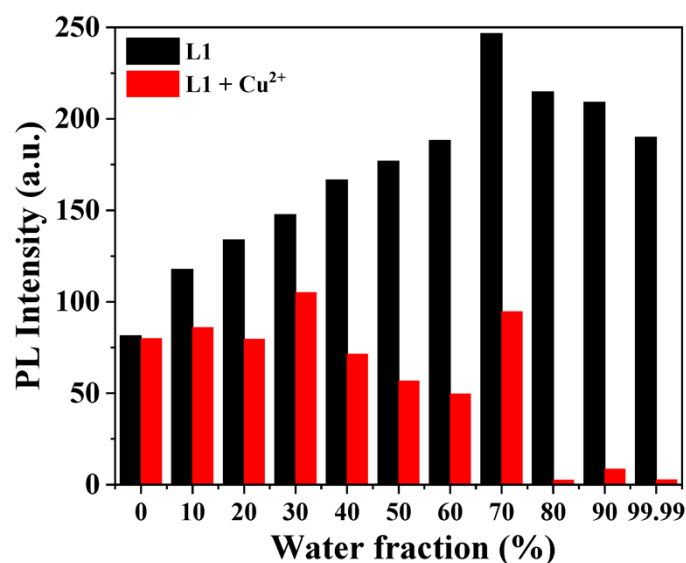

**Fig. S18** The fluorescence intensity of L1 at 525 nm before and after adding  $\text{Cu}^{2+}$  in THF/water mixtures. The concentrations of L1 and  $\text{Cu}^{2+}$  are  $1 \times 10^{-5} \text{ mol L}^{-1}$ .

### 6. Particle size of L1

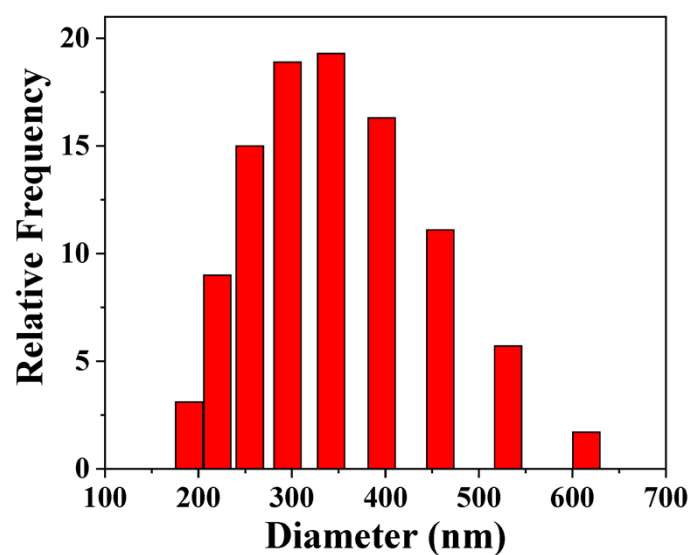

**Fig. S19** Particle size distribution of L1 in the solution ( $1 \times 10^{-5} \text{ mol L}^{-1}$ ,  $V_{\text{water}}/V_{\text{THF}} = 4/1$ )

## 7. Fluorescence lifetime

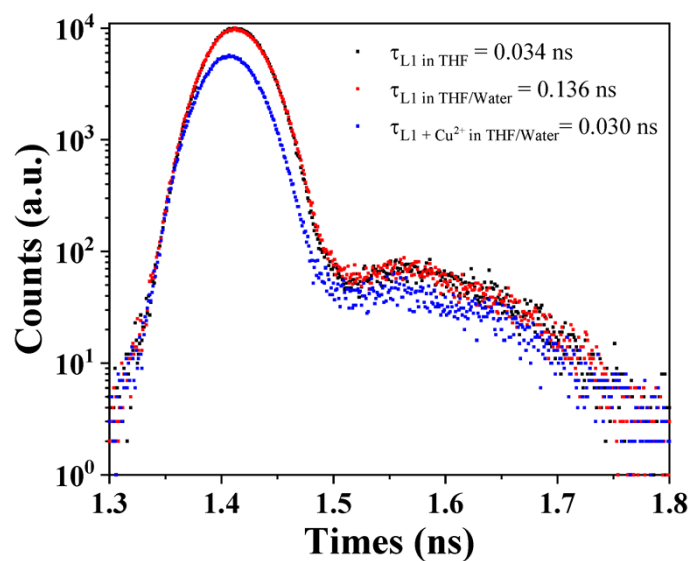

**Fig. S20** Fluorescence lifetimes of **L1** in THF, **L1** and **L1+Cu<sup>2+</sup>** in the solution ( $V_{\text{water}}/V_{\text{THF}} = 4/1$ ). The concentrations of **L1** and **Cu<sup>2+</sup>** are  $1 \times 10^{-5} \text{ mol L}^{-1}$ .

## 8. Effect of pH

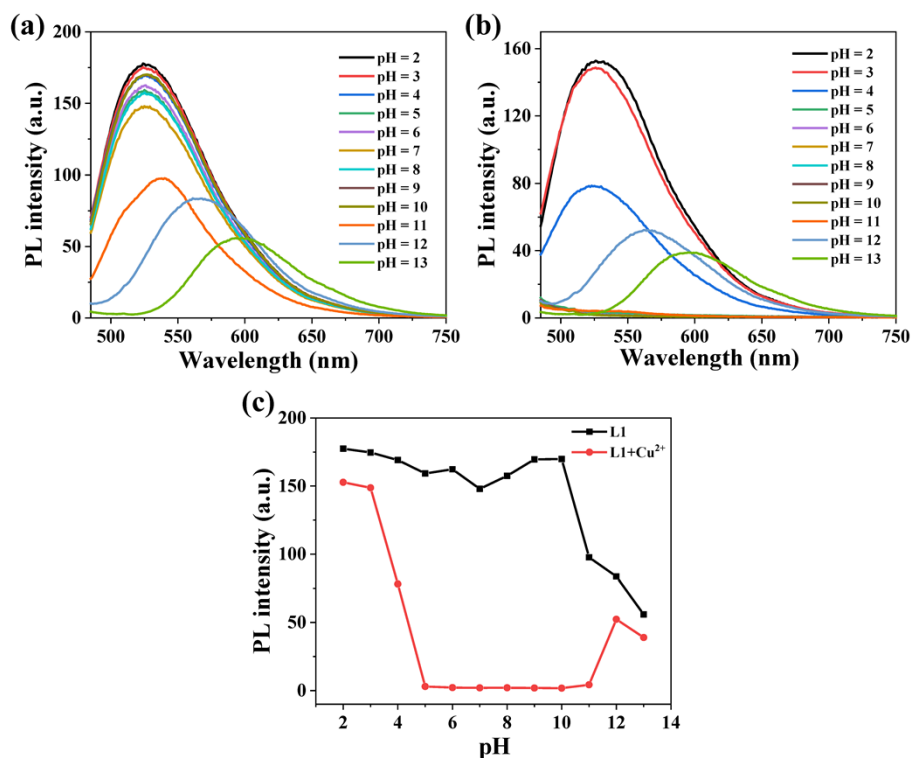

**Fig. S21** Fluorescence spectra of (a) **L1** and (b) **L1+Cu<sup>2+</sup>** in solutions ( $V_{\text{water}}/V_{\text{THF}} = 4/1$ ) with different pH values; (c) The fluorescence intensity of **L1** and **L1+Cu<sup>2+</sup>** as a function of pH values. The concentrations of **L1** and **Cu<sup>2+</sup>** are  $1 \times 10^{-5} \text{ mol L}^{-1}$ .  $\lambda_{\text{ex}} = 467 \text{ nm}$ .

### 9. Job's Plot

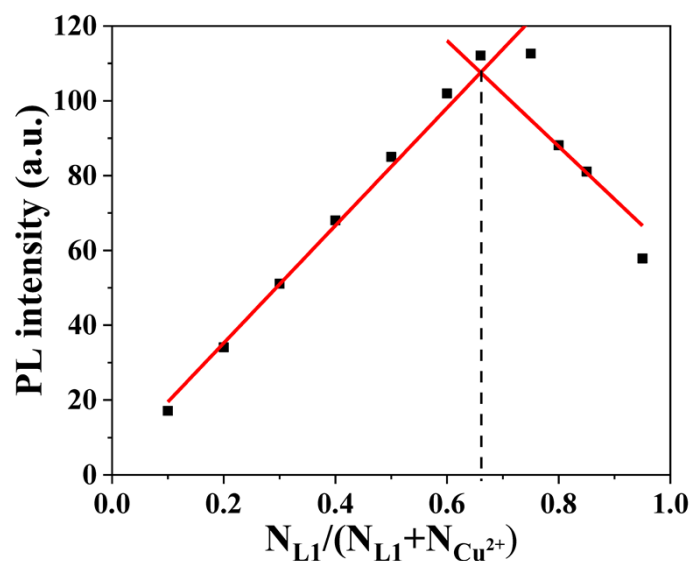

**Fig. S22** Job's Plot for determining the stoichiometry of **L1** and  $Cu^{2+}$  in the solution ( $V_{water}/V_{THF} = 4/1$ ). The emission intensity at 525 nm was plotted against the mole fraction of **L1** at an invariant total concentration of  $1 \times 10^{-5} \text{ mol L}^{-1}$ .

### 10. Benesi-Hildebrand plot

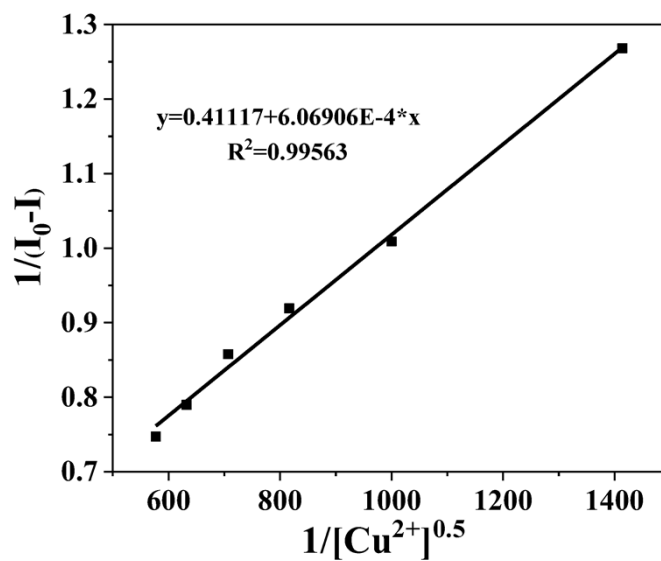

**Fig. S23** Benesi-Hildebrand plot of fluorescence intensity response of the **L1** toward  $Cu^{2+}$ .

## 11. Detection limit

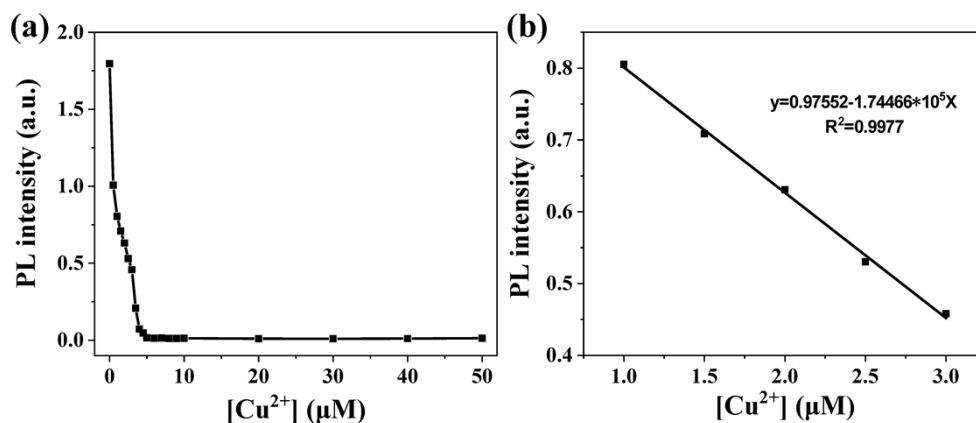

**Fig. S24** (a) The fluorescence intensity of L1 ( $1 \times 10^{-5}$  mol L $^{-1}$  in  $V_{\text{water}}/V_{\text{THF}} = 4/1$ ) at 525 nm as a function of the addition of Cu $^{2+}$  (0–50  $\mu\text{M}$ ). (b) Linear fitting of the emission data upon addition of Cu $^{2+}$ .

**Table S2** Comparison of the reported DL values of Cu $^{2+}$  probes

| Chemical structural formula                                                         | Solvent system                       | DL                         | Ref. |
|-------------------------------------------------------------------------------------|--------------------------------------|----------------------------|------|
| 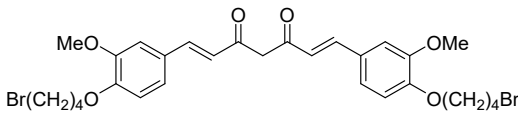 | PBS:CH $_3$ CN<br>(8:2, V/V)         | 2.54 $\mu\text{M}$         | 1    |
|  | TBS:DMSO<br>(6:4, V/V)               | 120 nM                     | 2    |
|  | BR buffer                            | 0.07 $\mu\text{g mL}^{-1}$ | 3    |
|  | acetate buffer                       | 1.431 ng mL $^{-1}$        | 4    |
|  | CH $_3$ CN:HEPES<br>(7:3, V/V)       | 1.21 $\mu\text{M}$         | 5    |
|  | HEPES:C $_2$ H $_5$ OH<br>(3:1, V/V) | 7.09 $\mu\text{M}$         | 6    |

|                                                                                     |                                       |             |           |
|-------------------------------------------------------------------------------------|---------------------------------------|-------------|-----------|
| 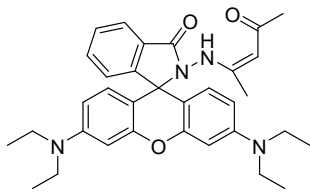   | EtOH:water<br>(9:1, V/V)              | 2.0 $\mu$ M | 7         |
|    | THF:Tris<br>(4:1, V/V)                | 236 nM      | 8         |
|    | PBS                                   | 200 nM      | 9         |
|   | DMSO:Water<br>(4:1, V/V)              | 800 nM      | 10        |
|  | CH <sub>3</sub> CN:Tris<br>(1:1, V/V) | 490 nM      | 11        |
|  | Water:THF<br>(8: 2, V/V)              | 149 nM      | This work |

## 12. Fluorescence intensity of Cu<sup>2+</sup> indicator paper

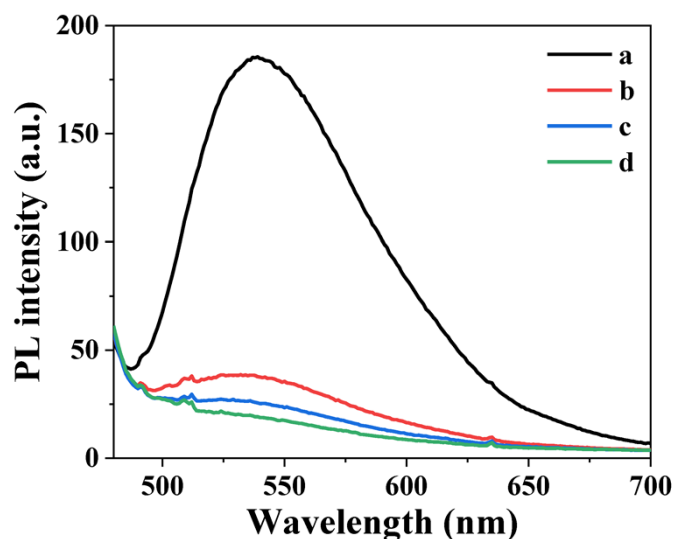

**Fig. S25** Fluorescence intensities of dried L1 indicator papers after soaking in Cu<sup>2+</sup> solutions with different concentrations for 10 s: (a) Cu<sup>2+</sup>-free, (b) 0.01 mM, (c) 0.1 mM, and (d) 1 mM.

## References

1. G. Xu, J. Wang, G. Si, M. Wang, X. Xue, B. Wu and S. Zhou, *Sens. Actuators, B*, 2016, **230**, 684-689.
2. Y. Li, Y.-X. Ji, L.-J. Song, Y. Zhang, Z.-C. Li, L. Yang and W.-C. Huang, *Res. Chem. Intermed.*, 2018, **44**, 5169-5180.
3. Z. Chen, L. Zhu, T. Song, J. Chen and Z. Guo, *Spectrochim. Acta, Part A*, 2009, **72**, 518-522.
4. D. P. Bhopate, P. G. Mahajan, K. M. Garadkar, G. B. Kolekar and S. R. Patil, *New J. Chem.*, 2015, **39**, 7086-7096.
5. S. Goswami, S. Chakraborty, S. Paul, S. Halder, S. Panja and S. K. Mukhopadhyay, *Org. Biomol. Chem.*, 2014, **12**, 3037-3044.
6. Z. Li, W. Zhao, X. Li, Y. Zhu, C. Liu, L. Wang, M. Yu, L. Wei, M. Tang and H. Zhang, *Inorg. Chem.*, 2012, **51**, 12444-12449.
7. Y. Hu, J. Zhang, Y. Z. Lv, X. H. Huang and S. L. Hu, *Spectrochim. Acta, Part A*, 2016, **157**, 164-169.
8. H.-F. Xie, C.-J. Yu, Y.-L. Huang, H. Xu, Q.-L. Zhang, X.-H. Sun, X. Feng and C. Redshaw, *Mater. Chem. Front.*, 2020, **4**, 1500-1506.
9. B. Liu, H. Zhou, B. Yang and X. Hu, *Sens. Actuators, B*, 2017, **246**, 554-562.
10. M. Aarjane, S. Slassi and A. Amine, *J. Mol. Struct.*, 2020, **1199**.
11. Q. Bing, L. Wang, D. Li and G. Wang, *Spectrochim. Acta, Part A*, 2018, **202**, 305-313.
